# Supplementary material for: Construction of the Chinese Route of Industrial Heritage Based on Spatial and Temporal Distribution Analysis
Source: MDPI journal article supplement (doi:10.3390/buildings14041065), 2024-04-11
Supplement: s1 [file s1]

**Table S1.** Data Sources for Chinese Industrial Heritage GIS Database.(as of 2021)

| Data sources                                                                                   | Specific items                                                                                                                                                                                | Total number |
|------------------------------------------------------------------------------------------------|-----------------------------------------------------------------------------------------------------------------------------------------------------------------------------------------------|--------------|
| list of Chinese cultural relic protection units                                                | List of National Key Cultural Relics Protection Units (8 batches, 134 items);                                                                                                                 |              |
|                                                                                                | List of cultural relics protected at provincial level by provinces (municipalities, autonomous regions and special administrative regions)(168 items);                                        |              |
|                                                                                                | List of important prefecture-level municipal heritage units: Nanjing, Hangzhou, Wuhan, Chengdu, Guangzhou, Jinan, Qingdao, Xi'an, Harbin, Shenyang, Dalian, Changsha and 13 others(74 items); |              |
|                                                                                                | List of important cities with outstanding historic buildings: Shanghai, Tianjin, Guangzhou, Beijing, Hangzhou, Dalian, Qingdao, Wuhan, Changsha and 9 others(86 items)                        |              |
| lists of local industrial heritage                                                             | Two batches of industrial heritage protection lists in Wuxi (2008, 34 items);                                                                                                                 |              |
|                                                                                                | a census of industrial heritage in Tianjin (2012, 108 items);                                                                                                                                 |              |
|                                                                                                | a list of industrial heritage in Liaoning Province (2011, 161 items);                                                                                                                         |              |
|                                                                                                | a list of industrial heritage protection in Hangzhou (2012, 69 items);                                                                                                                        |              |
| industrial heritage lists of other Chinese governments and authoritative academic institutions | a list of industrial heritage in Wuhan (2013, 27 items);                                                                                                                                      |              |
|                                                                                                | a list of industrial heritage protection in Jinan (2016, 58 items);                                                                                                                           |              |
|                                                                                                | a list of industrial heritage protection in Nanjing (2017, 68 items);                                                                                                                         |              |
|                                                                                                | a list of modern industrial heritage in Chengdu (2017, 27 items), etc.                                                                                                                        |              |
|                                                                                                | China National Mine Parks List (former Ministry of Land and Resources, 4 batches, 88 items in total);                                                                                         | 1681 items   |
|                                                                                                | National Industrial Heritage List (Ministry of Industry and Information Technology, 4 batches, 166 items in total)                                                                            |              |
|                                                                                                | China National Industrial Heritage Tourism Bases (2017, National Tourism Administration, 10 sites);                                                                                           |              |
|                                                                                                | China Industrial Heritage Protection List (China Association for Science and Technology and Urban Planning Society of China, 2 batches, 200 sites)                                            |              |
| academic works and related academic papers                                                     | <i>Atlas of Lanzhou's Industrial Heritage</i> (2008);                                                                                                                                         |              |
|                                                                                                | <i>Rust Traces: In Search of China's Industrial Heritage</i> (2008);                                                                                                                          |              |
|                                                                                                | <i>Modern Architecture and Industrial Heritage in Fangzi, Shandong</i> (2008);                                                                                                                |              |
|                                                                                                | <i>Treasures of Wuxi's Modern Industrial and Commercial Heritage</i> (2009);                                                                                                                  |              |
|                                                                                                | <i>Shanghai's Industrial Heritage</i> (2009);                                                                                                                                                 |              |
|                                                                                                | <i>A New Exploration of Shanghai's Industrial Heritage</i> (2009);                                                                                                                            |              |
|                                                                                                | <i>A First Look at Industrial Heritage Conservation: From the World to Tianjin</i> (2010);                                                                                                    |              |
|                                                                                                | <i>Research on the Conservation and Reuse of Xi'an's Industrial Architectural Heritage</i> (2011);                                                                                            |              |
|                                                                                                | <i>Nanjing Industrial Heritage</i> (2012);                                                                                                                                                    |              |
|                                                                                                | <i>Study on the Conservation and Tourism Utilization of Industrial Heritage in Northeast China</i> (2012);                                                                                    |              |
|                                                                                                | <i>Hunan Traffic Cultural Heritage</i> (2012);                                                                                                                                                |              |
|                                                                                                | <i>Reading the Industrial Heritage of Wuhan</i> (2013);                                                                                                                                       |              |
|                                                                                                | <i>Research on the Industrial Heritage of Hanyeping in the Perspective of Cultural Routes</i> (2013);                                                                                         |              |
|                                                                                                | <i>Searching for China's State-protected Industrial Heritage" (2013);</i>                                                                                                                     |              |
|                                                                                                | <i>The Conservation and Utilisation of Chongqing's Industrial Heritage and Urban Revitalisation</i> (2014);                                                                                   |              |
|                                                                                                | <i>Study on the Conservation and Reuse of Industrial Heritage in Shanghai</i> (2014);                                                                                                         |              |
|                                                                                                | <i>Old Factories in Hexi, Tianjin - The Industrial Heritage of Hexi, Tianjin</i> (2014);                                                                                                      |              |
|                                                                                                | <i>Research on the Heritage of Industrial Civilisation in the Central Plains</i> (2016);                                                                                                      |              |

|                     |                                                                                                                                                                                                                                                                                    |  |  |
|---------------------|------------------------------------------------------------------------------------------------------------------------------------------------------------------------------------------------------------------------------------------------------------------------------------|--|--|
| field investigation | <i>Important New Findings from the Third National Cultural Relics Census in Hebei Province: Important Historical Sites and Representative Buildings of Modern Times</i> (2016) and 19 other publications;                                                                          |  |  |
|                     | 2902 academic journal papers and 771 master's degree theses in CNKI database<br>field investigation in Tianjin, Fuzhou, Quanzhou, Xiamen, Beijing, Tianjin, Qingdao, Chongqing, Guangzhou, Xi'an, Shanghai, Nanjing, Chongqing, Wuhan, Harbin, Shijiazhuang, Tangshan, Qinhuangdao |  |  |

**Table S2.** List of CRIH Key Sites.

| Level                       | Specific items                                         |              |                            |
|-----------------------------|--------------------------------------------------------|--------------|----------------------------|
|                             | Industrial heritage                                    | Province     | Region/City                |
| Class 1 (21 items in total) | Degree Branch Printing Bureau                          | Beijing      | Beijing                    |
|                             | Kailuan Coal Mine                                      | Hebei        | Tangshan                   |
|                             | Qinhuangdao Port                                       | Hebei        | Qinhuangdao                |
|                             | China's first tractor factory                          | Henan        | Luoyang                    |
|                             | Daqing Oilfield (including the first well of Iron Man) | Heilongjiang | Daqing                     |
|                             | Zhangyu Brewing Company                                | Shandong     | Yantai                     |
|                             | Tsingtao Brewery                                       | Shandong     | Qingdao                    |
|                             | the former site of Zhongxing Coal Mining Company       | Shandong     | Zaozhuang                  |
|                             | Anshan Steelworks                                      | Liaoning     | Anshan                     |
|                             | Jinling Machine Manufacturing Bureau                   | Jiangsu      | Nanjing                    |
|                             | the former site of Maoxin Flour Mill                   | Jiangsu      | Wuxi                       |
|                             | the former site of Dasheng Yarn Factory                | Jiangsu      | Nantong                    |
|                             | Wanshan mercury mine site                              | Guizhou      | Tongren                    |
|                             | Yanchang Petroleum                                     | Shaanxi      | Yan'an                     |
|                             | First Arsenal                                          | Chongqing    | Chongqing                  |
|                             | Shilongba Hydropower Station                           | Yunnan       | Kunming                    |
|                             | Dongwo Hydropower Station                              | Lanzhou      | Luzhou                     |
|                             | Huaxin Cement Plant                                    | Hubei        | Huangshi                   |
|                             | Xihuashan Tungsten Mine                                | Jiangxi      | Ganzhou                    |
|                             | Hanyeping Company                                      | Hubei        | Wuhan, Huangshi, Pingxiang |
|                             | Yumen Oilfield No.1 OilWell                            | Gansu        | Yumen                      |
| Class 2 (79 items in total) | Fuziling Reservoir with Arch Dam                       | Anhui        | Lu'an                      |
|                             | Huaihe River big iron bridge                           | Anhui        | Bengbu                     |
|                             | 491 radio station                                      | Beijing      | Beijing                    |
|                             | atomic energy "Yi Dui Yi Qi" (The China's first heavy  | Beijing      | Beijing                    |

---

water reactor and cyclotron)

|                                                          |                                               |              |
|----------------------------------------------------------|-----------------------------------------------|--------------|
| Jingzhang Railway Nankou section to Badaling section     | Beijing                                       | Beijing      |
| Fuzhou Mawei Shipyard                                    | Fujian                                        | Fuzhou       |
| China National Nuclear Plant 404                         | Gansu                                         | Lanzhou      |
| Liujiaxia Hydropower Station                             | Gansu                                         | Linxia       |
| Shunde Sugar Factory                                     | Guangdong                                     | Foshan       |
| Ancient Nanfeng Kiln                                     | Guangdong                                     | Foshan       |
| Shinan Bridge                                            | Guangdong                                     | Dongguan     |
| Maotai Brewery Industrial Heritage Group                 | Guizhou                                       | Zunyi        |
| Tianmen River Hydropower Station                         | Guizhou                                       | Zunyi        |
| Lingao Cape Lighthouse                                   | Hainan                                        | Lingao       |
| Shiluo Iron Mine                                         |                                               | Changjiang   |
| Tangshan Locomotive and Rolling Stock Plant              | Hebei                                         | Tangshan     |
| Qixin Cement Plant                                       | Hebei                                         | Tangshan     |
| Jingxing Mining Bureau                                   | Hebei                                         | Shijiazhuang |
| former site of Yaohua Glass Factory                      | Hebei                                         | Qinhuangdao  |
| Kailuan Mining Bureau Qinhuangdao Power Plant            | Hebei                                         | Qinhuangdao  |
| Jiaozuo Yingfu Coal Mine                                 | Shandong                                      | Jiaozuo      |
| Middle East Railway Complex                              | Heilongjiang, Jilin, Liaoning, Inner Mongolia |              |
| Harbin Cigarette Factory                                 | Heilongjiang                                  | Harbin       |
| Wuhan Yangtze River Bridge                               | Hubei                                         | Wuhan        |
| Dazhimen Railway Station                                 | Hubei                                         | Wuhan        |
| Xiangtan Manganese Mine                                  | Hunan                                         | Xiangtan     |
| the former site of the 711 Meritorious Uranium Mine      | Hunan                                         | Chenzhou     |
| the Zhuzhou General Engine Factory of the Yuehan Railway | Hunan                                         | Zhuzhou      |
| the Antimony Mine in the Xi Mountain                     | Hunan                                         | Loudi        |
| Tonghua Winery underground wine storage cellar           | Jilin                                         | Tonghua      |
| Changchun First Automobile Manufacturing Plant           | Jilin                                         | Changchun    |
| Changchun Film Studio                                    | Jilin                                         | Changchun    |
| Yongli Softsteel Factory                                 | Jiangsu                                       | Nanjing      |
| Pukou Railway Station                                    | Jiangsu                                       | Nanjing      |

---

---

|                                                                     |          |           |
|---------------------------------------------------------------------|----------|-----------|
| Yanghe Old Cellar Group                                             | Jiangsu  | Suqian    |
| Guantian Central Military Commission Arsenal                        | Jiangxi  | Ganzhou   |
| Lushun Dockyard                                                     | Liaoning | Dalian    |
| Shenyang Foundry                                                    | Liaoning | Shenyang  |
| Fuxin Haizhou Open Pit Mine                                         | Liaoning | Fuxin     |
| the former site of Benxi Lake Coal and Iron Company                 | Liaoning | Benxi     |
| Dalian Shipyard                                                     | Liaoning | Dalian    |
| National Cotton No.5 Factory                                        | Shandong | Qingdao   |
| Lokou Yellow River Railway Bridge                                   | Shandong | Jinan     |
| Fangzi Railway Station Complex                                      | Shandong | Weifang   |
| Jinan Station Modern Complex                                        | Shandong | Jinan     |
| Jinan Machine Works of Jinpu Railway                                | Shandong | Jinan     |
| Datong Coal Mine                                                    | Shanxi   | Datong    |
| Taiyuan Machine Bureau                                              | Shanxi   | Taiyuan   |
| the former site of Huangyadong Arsenal                              | Shanxi   | Changzhi  |
| Shenxin Yarn Factory                                                | Shaanxi  | Baoji     |
| Wangshiwa Coal Mine                                                 | Shaanxi  | Tongchuan |
| Yangshupu Water Works                                               | Shanghai | Shanghai  |
| Bund Signal Station                                                 | Shanghai | Shanghai  |
| the former site of the Central Mint                                 | Shanghai | Shanghai  |
| 1933 Old Field                                                      | Shanghai | Shanghai  |
| Great Northern Telegraph Company                                    | Shanghai | Shanghai  |
| Luzhou Old Cellar Group and Brewing Workshop                        | Sichuan  | Luzhou    |
| Xianshi Soy Sauce Brewing Workshop                                  | Sichuan  | Luzhou    |
| Zigong Well Salt                                                    | Sichuan  | Zigong    |
| Jiayang Coal Mine                                                   | Sichuan  | Leshan    |
| Panzhihua Iron and Steel Plant                                      | Sichuan  | Panzhihua |
| the former site of the Third-Front Nuclear Weapons Development Base | Sichuan  | Mianyang  |
| the former site of the first controlled fusion experimental device  | Sichuan  | Leshan    |
| Yonglichuan Factory                                                 | Sichuan  | Leshan    |
| Dagu Dockyard of the Beiyang Marine Division                        | Tianjin  | Tianjin   |
| Tianjin West Station                                                | Tianjin  | Tianjin   |
| Tanggu South Station                                                | Tianjin  | Tianjin   |

---

---

|                                              |           |           |
|----------------------------------------------|-----------|-----------|
| Xinkaihe Railway Station                     | Tianjin   | Tianjin   |
| Cocotohai 111 mine                           | Xinjiang  | Altay     |
| Karamay No. 1 well                           | Xinjiang  | Karamay   |
| Fengqing Tea Factory                         | Yunnan    | Lincang   |
| Lufeng Lianxiangguan Bridge and Tunnel Group | Yunnan    | Chuxiong  |
| Wujiashai Railway Bridge                     | Yunnan    | Honghe    |
| Biseizhai Station                            | Yunnan    | Honghe    |
| Jijie Railway Station                        | Yunnan    | Honghe    |
| Huabushan Lighthouse                         | Zhejiang  | Zhoushan  |
| the former site of Tongyigong Yarn Factory   | Zhejiang  | Hangzhou  |
| Qiantang River Bridge                        | Zhejiang  | Hangzhou  |
| nuclear industry 816 project                 | Chongqing | Chongqing |

---
