# Supplementary material for: Construction of the Chinese Route of Industrial Heritage Based on Spatial and Temporal Distribution Analysis
Source: MDPI journal article supplement (doi:10.3390/buildings14041065), 2024-04-11
Supplement: s1 [file s1]

Archive with 1 entries (1 files):
- buildings-2888277-supplementary.pdf
